# Supplementary material for: Quantitative tissue analysis and role of myeloid cells in non-small cell lung cancer
Source: PubMed Central journal article supplement — J Immunother Cancer. 2022 Jul 6;10(7):e005025. doi: 10.1136/jitc-2022-005025 (PMC9260844; doi:10.1136/jitc-2022-005025), 2022-07-06
Supplement: jitc-2022-005025supp007.pdf [file jitc-2022-005025supp007.pdf]

**Supplementary Table S1**

|                | <b>Cohort 1<br/>(N=379)</b> | <b>Cohort 2<br/>(N=230)</b> | <b>Cohort 3 (N=138)</b> | <b>Cohort 4 (N=46)</b> |
|----------------|-----------------------------|-----------------------------|-------------------------|------------------------|
| Age            | 66.4 +/- 10.5               | 62.1 +/- 9.1                | N/A                     | 72.2 +/- 10.7          |
| Gender         |                             |                             |                         |                        |
| Male           | 121                         | 217                         | 47                      | 25                     |
| Female         | 153                         | 43                          | 91                      | 21                     |
| Histology      |                             |                             | N/A                     |                        |
| Adenocarcinoma | 147                         | 132                         |                         | 28                     |
| Squamous       | 47                          | 163                         |                         | 10                     |
| Other          | 78                          | 50                          |                         | 2                      |
| Smoking        |                             |                             | N/A                     |                        |
| Ever-smoker    | 216                         | 280                         |                         | 36                     |
| Never smoker   | 43                          | 29                          |                         | 6                      |
| Stage          |                             |                             | N/A                     |                        |
| 1              | 163                         | 106                         |                         | 10                     |
| 2              | 57                          | 92                          |                         | 6                      |
| 3              | 37                          | 100                         |                         | 13                     |
| 4              | 11                          | 40                          |                         | 12                     |
