# Supplementary figures and images for: Quantitative tissue analysis and role of myeloid cells in non-small cell lung cancer
Source: PubMed Central journal article supplement — J Immunother Cancer. 2022 Jul 6;10(7):e005025. doi: 10.1136/jitc-2022-005025 (PMC9260844; doi:10.1136/jitc-2022-005025), 2022-07-06

## Supplemental Figure S1

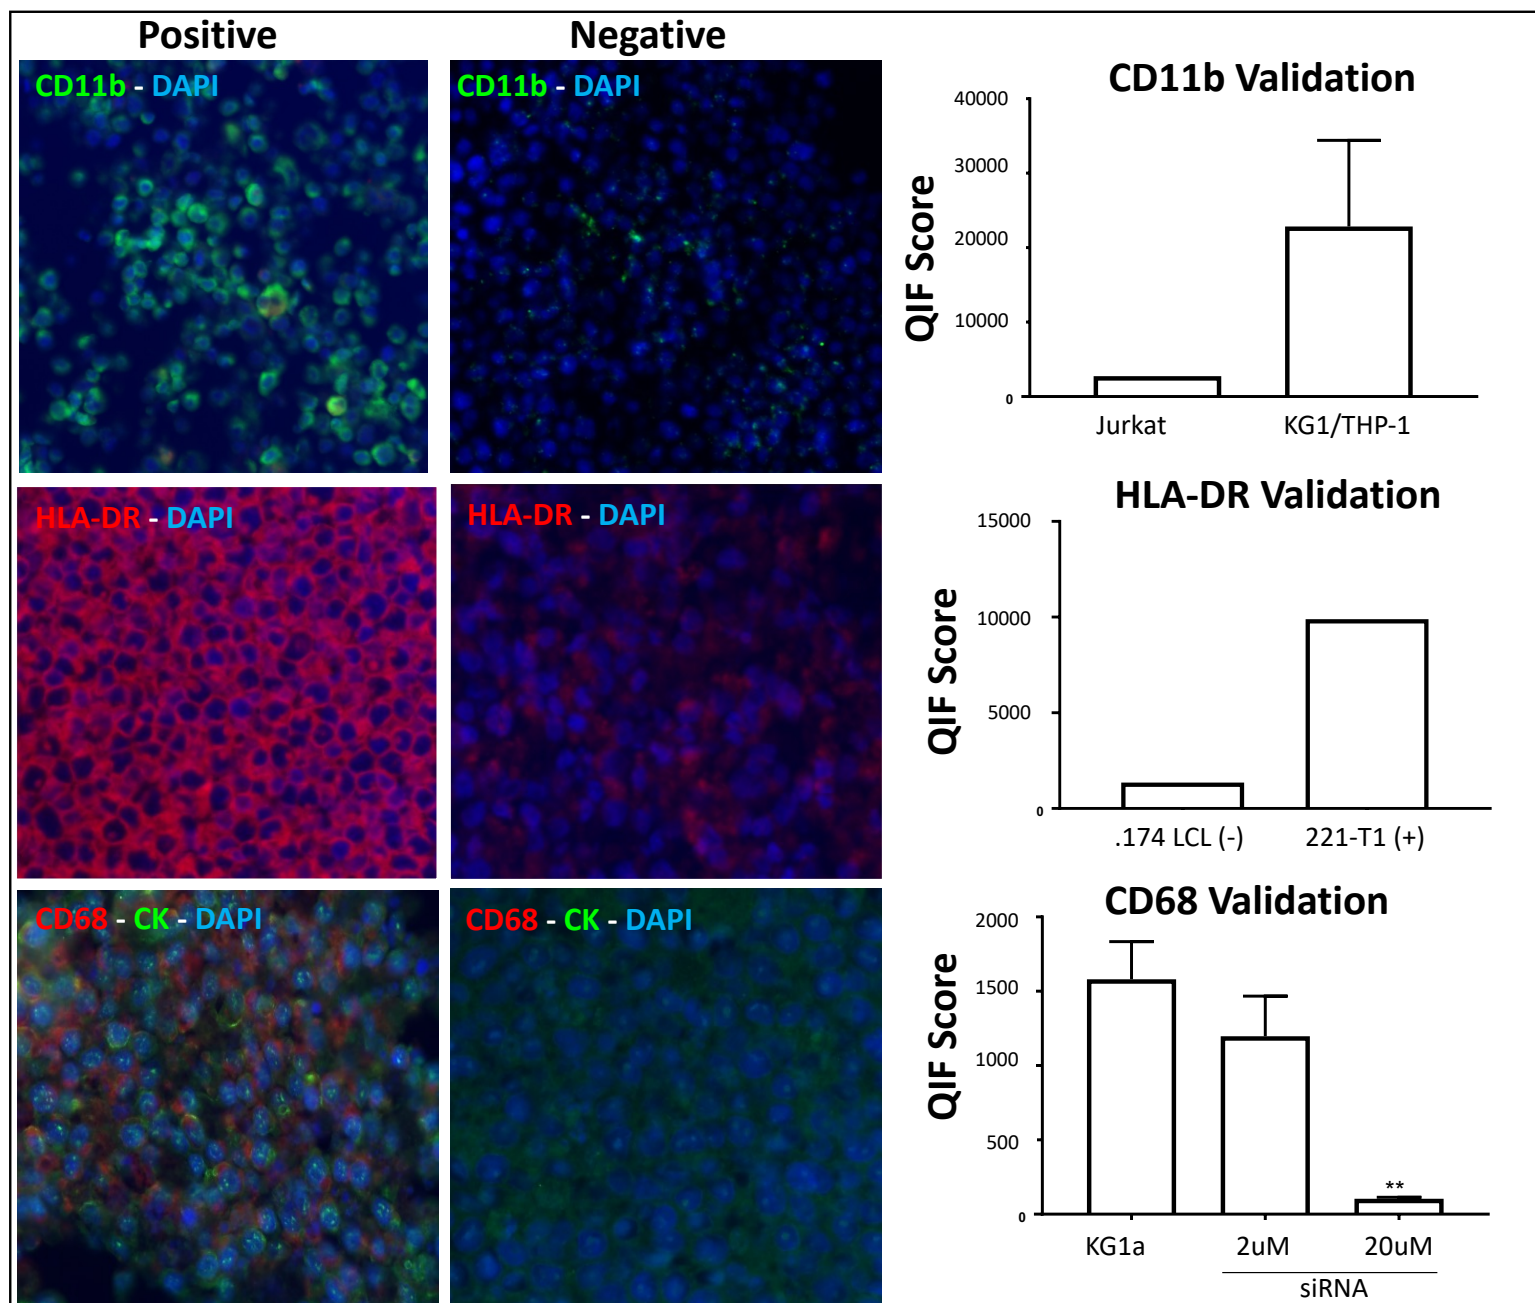

Supplement: jitc-2022-005025supp001.pdf [file jitc-2022-005025supp001.pdf]

## Supplemental Figure S2

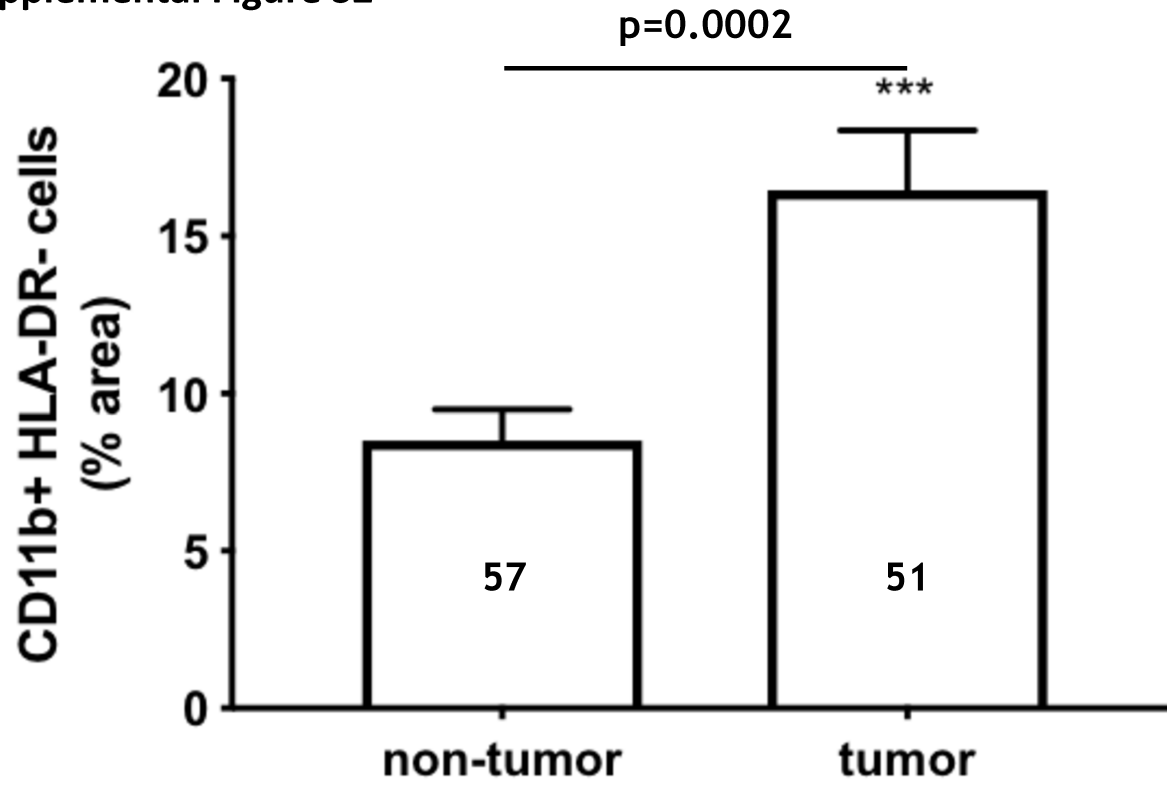

Supplement: jitc-2022-005025supp002.pdf [file jitc-2022-005025supp002.pdf]

## Supplemental Figure S3

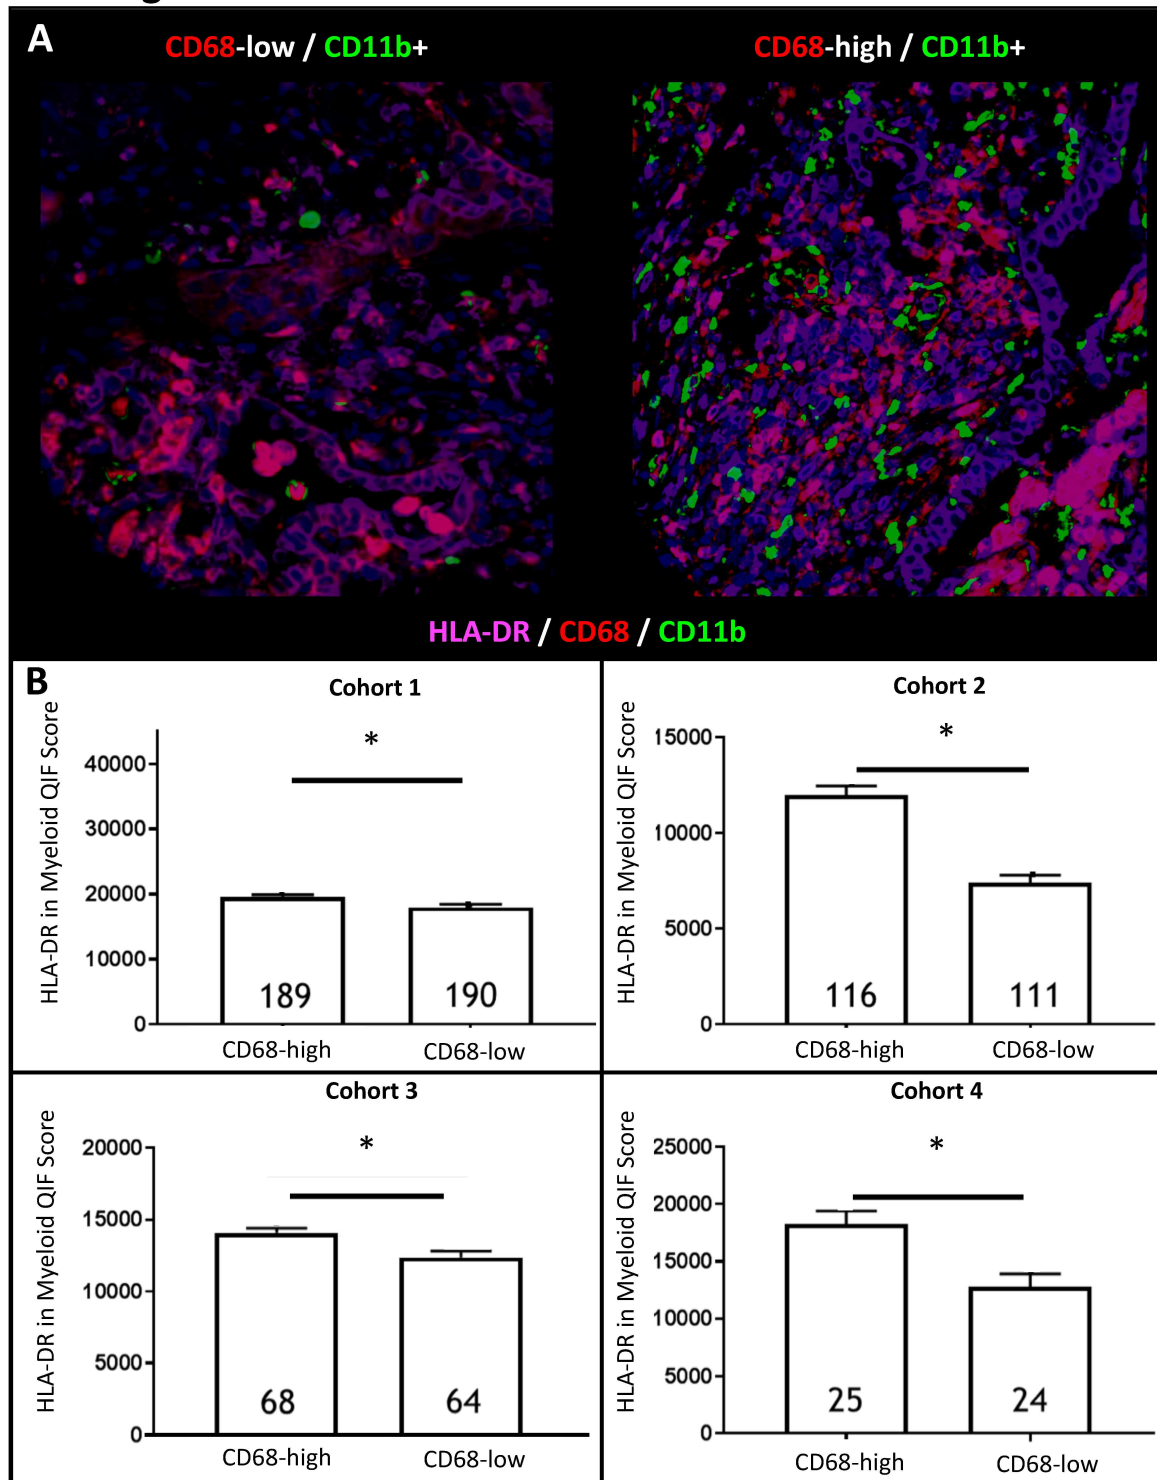

Supplement: jitc-2022-005025supp003.pdf [file jitc-2022-005025supp003.pdf]

## Supplemental Figure S4

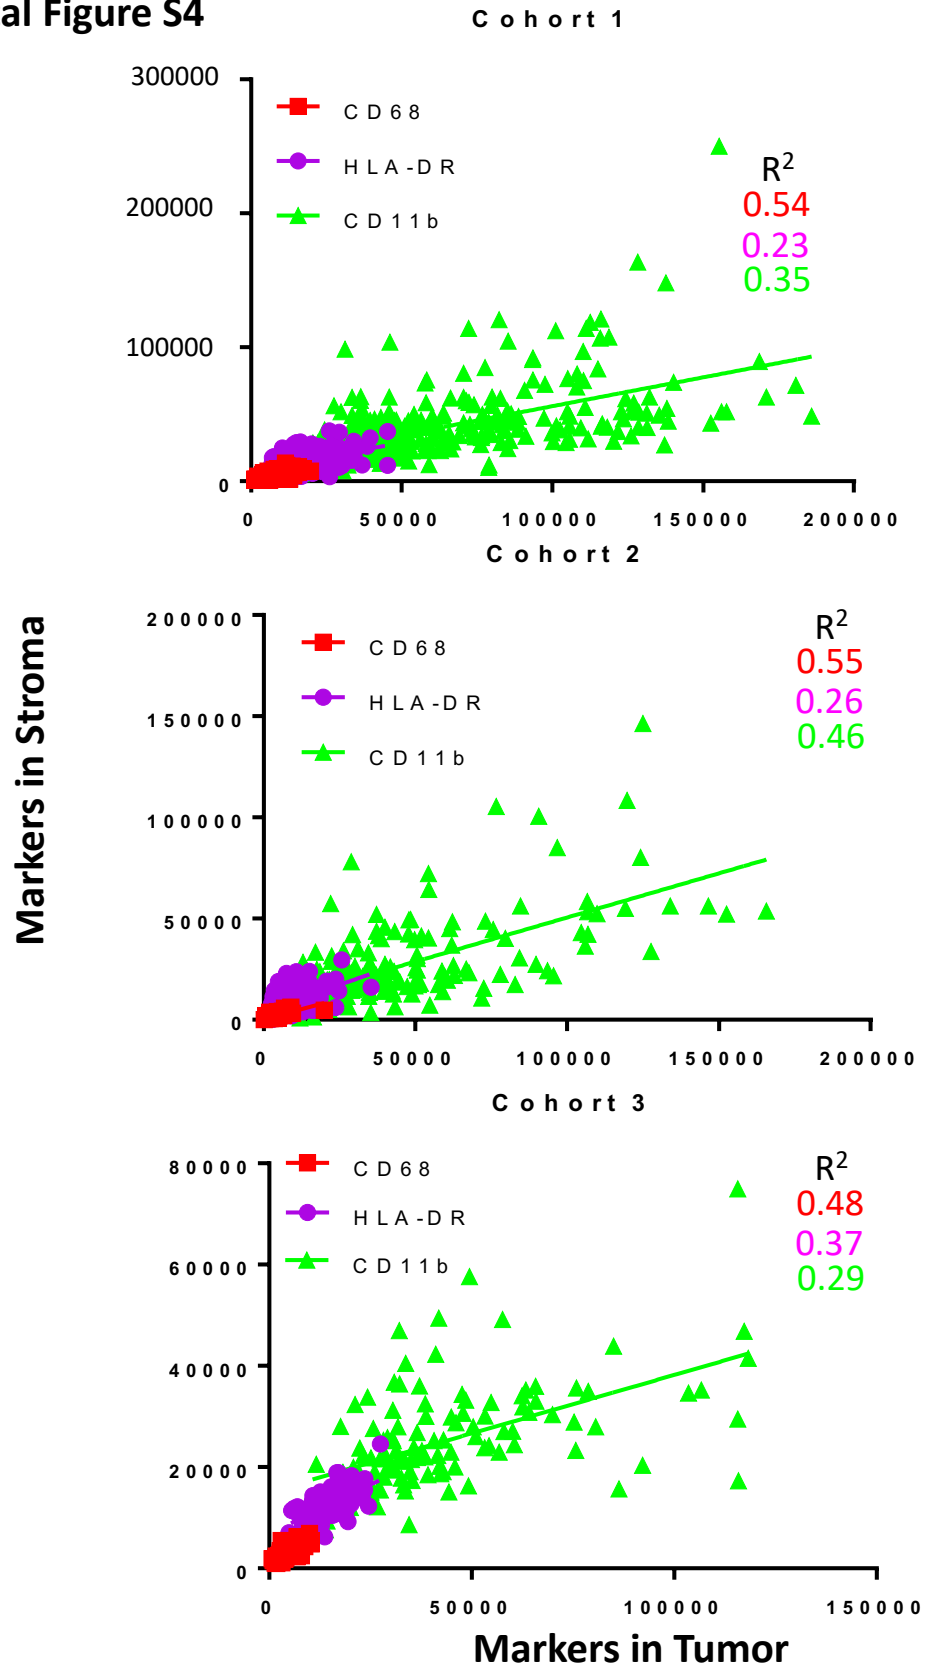

Supplement: jitc-2022-005025supp004.pdf [file jitc-2022-005025supp004.pdf]

## Supplemental Figure S5

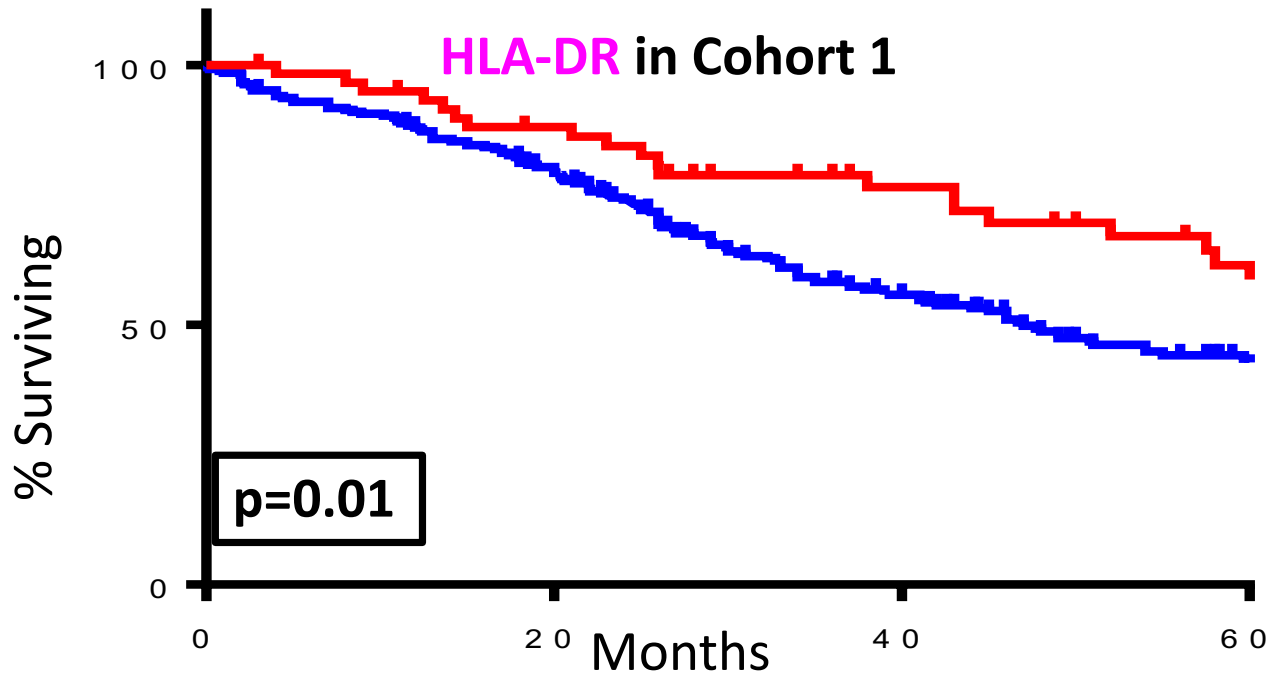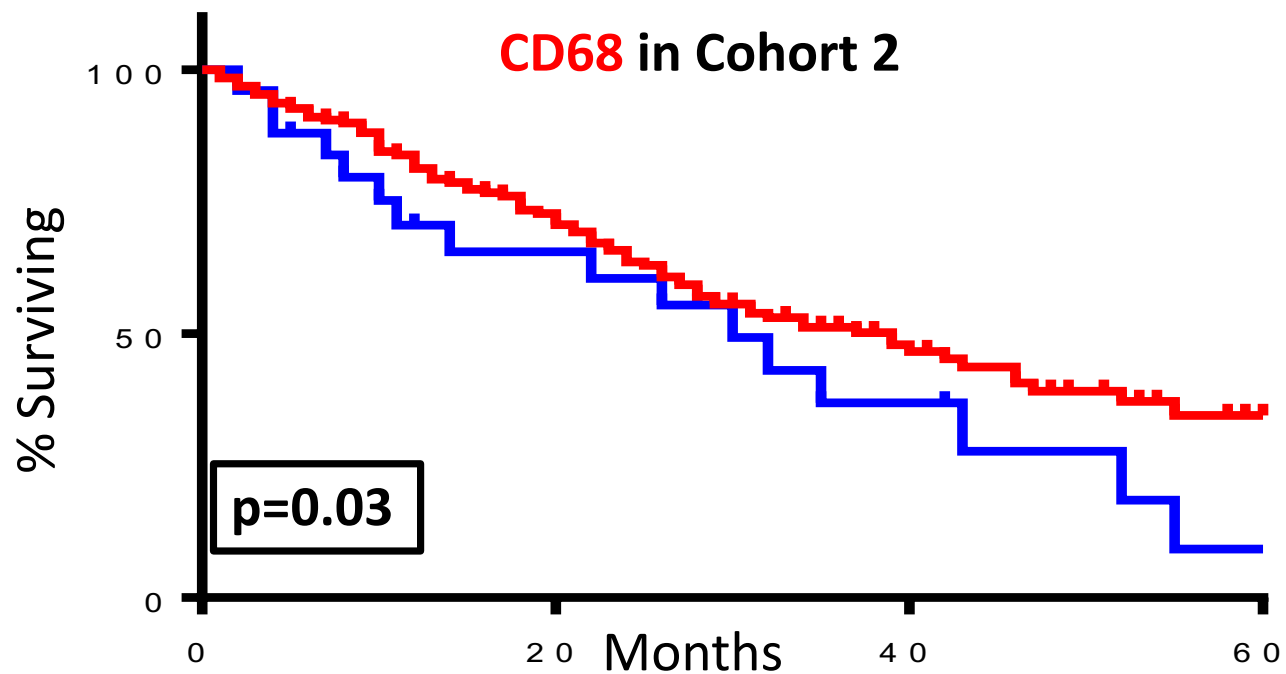

Supplement: jitc-2022-005025supp005.pdf [file jitc-2022-005025supp005.pdf]

## Supplemental Figure S6

## Regressions Across Tissue Blocks

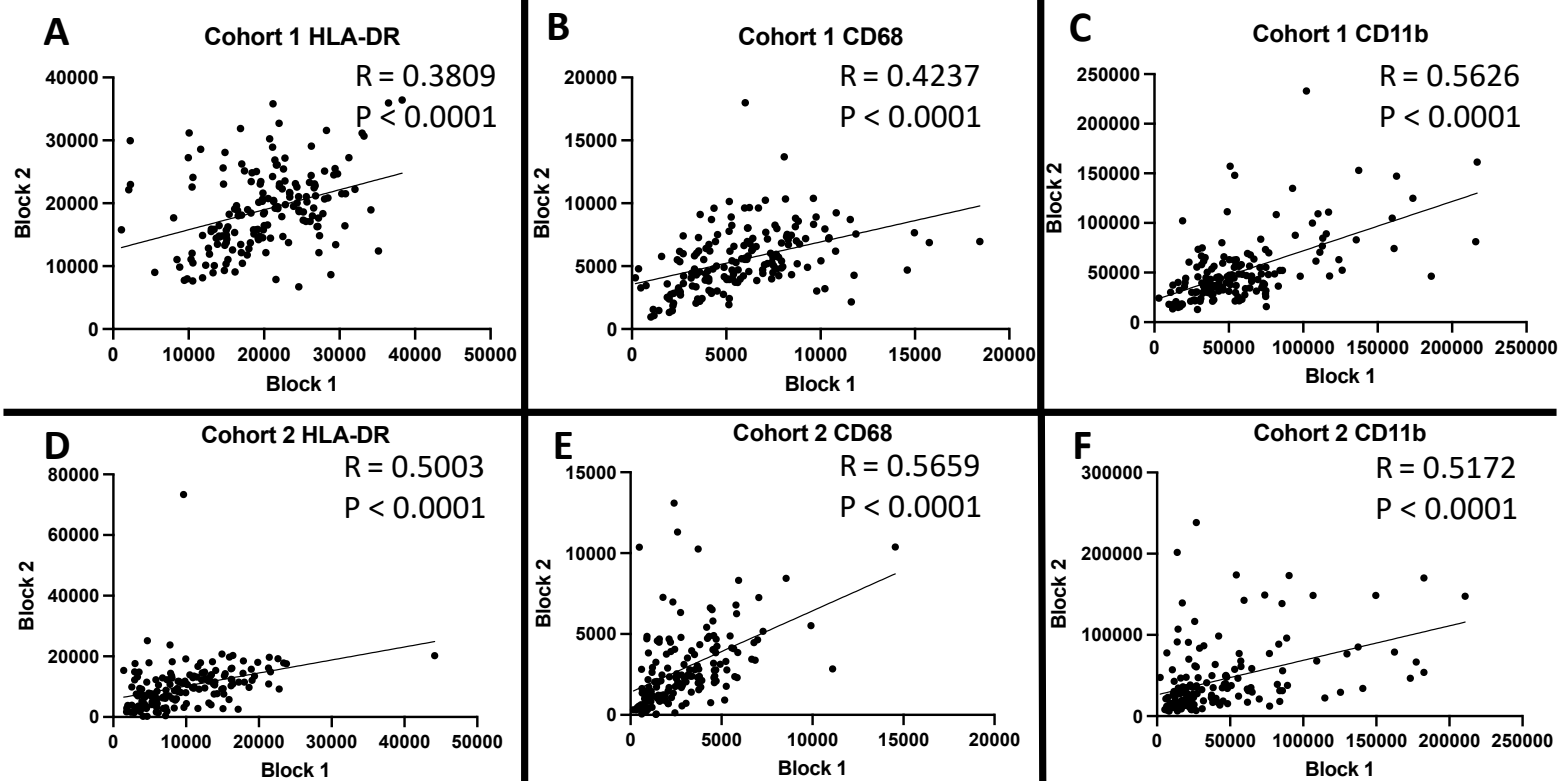

Supplement: jitc-2022-005025supp006.pdf [file jitc-2022-005025supp006.pdf]
